# Supplementary material for: Discovery, validation, and in silico functional characterization of EST-SSR markers in Eucalyptus globulus
Source: Springer Nature journal article supplement (doi:10.1007/s11295-011-0440-0), 2011-11-30
Supplement: MOESM2 [file 11295_2011_440_MOESM2_ESM.xls]

## Sheet: biological process
Online Resource 2 -Gene Ontology annotation
Sequence Distribution
Graph Level	GO Term	#Seq	Score	Parents
7	actin cytoskeleton organization and biogenesis	1	1.0	actin filament-based process
6	actin filament-based process	1	0.6	cytoskeleton organization and biogenesis
5	alcohol biosynthetic process	2	0.431	cellular biosynthetic process, alcohol metabolic process
5	alcohol catabolic process	2	0.259	cellular catabolic process, alcohol metabolic process
4	alcohol metabolic process	5	0.630	cellular metabolic process
5	amine biosynthetic process	7	1852	nitrogen compound biosynthetic process, amine metabolic process
4	amine metabolic process	10	2005	nitrogen compound metabolic process, cellular metabolic process
6	amino acid activation	1	0.215	amino acid metabolic process
4	amino acid and derivative metabolic process	10	2005	primary metabolic process, cellular metabolic process
6	amino acid biosynthetic process	7	3088	amine biosynthetic process, amino acid metabolic process
5	amino acid metabolic process	10	3342	amino acid and derivative metabolic process, carboxylic acid metabolic process, amine metabolic process
5	anion transport	1	1.0	ion transport
7	aspartate family amino acid biosynthetic process	2	0.96	aspartate family amino acid metabolic process, amino acid biosynthetic process
6	aspartate family amino acid metabolic process	2	0.576	amino acid metabolic process
6	ATP biosynthetic process	2	1.2	purine ribonucleoside triphosphate biosynthetic process, ATP metabolic process
5	ATP metabolic process	2	0.72	purine ribonucleoside triphosphate metabolic process
5	ATP synthesis coupled proton transport	2	2.0	ATP biosynthetic process, energy coupled proton transport, down electrochemical gradient, oxidative phosphorylation
2	biological adhesion	2	1632	biological_process
2	biological regulation	11	1742	biological_process
1	biological_process	153	44.12
5	biopolymer biosynthetic process	3	0.945	macromolecule biosynthetic process, biopolymer metabolic process
5	biopolymer catabolic process	1	0.077	macromolecule catabolic process, biopolymer metabolic process
6	biopolymer glycosylation	2	1.2	biopolymer modification
4	biopolymer metabolic process	26	5023	macromolecule metabolic process
5	biopolymer modification	20	6259	biopolymer metabolic process
3	biosynthetic process	33	12.16	metabolic process
5	carbohydrate biosynthetic process	4	0.777	carbohydrate metabolic process
5	carbohydrate catabolic process	2	0.155	carbohydrate metabolic process
4	carbohydrate metabolic process	12	5689	primary metabolic process
3	carbon utilization	4	2.8	metabolic process
4	carbon utilization by fixation of carbon dioxide	3	3.0	carbon utilization
5	carboxylic acid metabolic process	10	3005	organic acid metabolic process
3	catabolic process	3	0.171	metabolic process
5	cation transport	5	2219	ion transport
3	cell adhesion	2	2719	biological adhesion, cellular process
3	cell communication	6	2424	cellular process
4	cell death	1	0.36	death, cell development, cellular developmental process
3	cell development	1	0.215	cell differentiation, cellular process
4	cell differentiation	1	0.489	cellular developmental process
4	cell redox homeostasis	3	3.0	cellular homeostasis
5	cell surface receptor linked signal transduction	2	1.2	signal transduction
5	cell-matrix adhesion	2	2.0	cell-substrate adhesion
4	cell-substrate adhesion	2	1.2	cell adhesion
4	cellular biosynthetic process	23	7187	biosynthetic process, cellular metabolic process
6	cellular carbohydrate catabolic process	2	0.259	cellular carbohydrate metabolic process, carbohydrate catabolic process, cellular macromolecule catabolic process
5	cellular carbohydrate metabolic process	7	0.976	carbohydrate metabolic process, cellular metabolic process
4	cellular catabolic process	3	0.285	catabolic process, cellular metabolic process
4	cellular component assembly	4	1152	cellular component organization and biogenesis
3	cellular component organization and biogenesis	9	2404	cellular process
3	cellular developmental process	1	0.653	developmental process, cellular process
3	cellular homeostasis	3	1799	homeostatic process, cellular process
4	cellular lipid metabolic process	3	0.791	lipid metabolic process, cellular metabolic process
3	cellular localization	4	0.863	cellular component organization and biogenesis, localization
5	cellular macromolecule catabolic process	3	0.371	cellular catabolic process, macromolecule catabolic process
4	cellular macromolecule metabolic process	41	11.67	macromolecule metabolic process, cellular metabolic process
3	cellular metabolic process	83	21.20	metabolic process, cellular process
null	cellular polysaccharide biosynthetic process	2	0.96	cellular polysaccharide metabolic process, polysaccharide biosynthetic process
5	cellular polysaccharide metabolic process	2	0.576	polysaccharide metabolic process, cellular carbohydrate metabolic process, cellular macromolecule metabolic process
2	cellular process	96	20.98	biological_process
6	cellular protein catabolic process	1	0.215	cellular protein metabolic process, protein catabolic process, cellular macromolecule catabolic process
5	cellular protein metabolic process	39	18.88	protein metabolic process, cellular macromolecule metabolic process
4	cellularization	1	0.6	multicellular organismal development, cellular developmental process
4	cellularization of the embryo sac	1	1.0	megagametogenesis, cellularization
8	cellulose biosynthetic process	1	1.0	cellulose metabolic process, glucan biosynthetic process
7	cellulose metabolic process	1	0.6	glucan metabolic process
8	chaperone cofactor-dependent protein folding	1	1.0	'de novo' posttranslational protein folding
6	chlorophyll biosynthetic process	1	1.0	porphyrin biosynthetic process, pigment biosynthetic process, chlorophyll metabolic process
5	chlorophyll metabolic process	1	0.6	pigment metabolic process, porphyrin metabolic process
5	chromatin assembly	1	0.6	DNA packaging, cellular component assembly, chromatin assembly or disassembly
8	chromatin assembly or disassembly	1	0.36	establishment and/or maintenance of chromatin architecture
5	chromosome organization and biogenesis	1	0.129	organelle organization and biogenesis
5	cofactor biosynthetic process	1	0.36	cofactor metabolic process, cellular biosynthetic process
4	cofactor metabolic process	1	0.215	cellular metabolic process
4	cyanide metabolic process	1	1.0	nitrogen compound metabolic process, one-carbon compound metabolic process
7	cysteine biosynthetic process	2	1.2	cysteine metabolic process, serine family amino acid biosynthetic process, sulfur amino acid biosynthetic process
8	cysteine biosynthetic process from serine	2	2.0	cysteine biosynthetic process, L-serine metabolic process
6	cysteine metabolic process	2	0.72	serine family amino acid metabolic process, sulfur amino acid metabolic process
5	cytoskeleton organization and biogenesis	2	2.36	organelle organization and biogenesis
7	'de novo' posttranslational protein folding	1	0.6	'de novo' protein folding
7	'de novo' protein folding	1	0.36	protein folding
3	death	1	0.215	developmental process
3	defense response	2	2.0	response to stimulus
7	deoxyribonucleoside diphosphate metabolic process	1	1.0	deoxyribonucleotide metabolic process, nucleoside diphosphate metabolic process
6	deoxyribonucleotide metabolic process	1	0.6	nucleotide metabolic process
6	dephosphorylation	3	1799	phosphate metabolic process
4	detoxification of nitrogen compound	1	1.0	response to nitrosative stress, response to toxin, nitrogen compound metabolic process
2	developmental process	1	0.254	biological_process
5	diaminopimelate metabolic process	1	0.6	amine metabolic process, dicarboxylic acid metabolic process
6	dicarboxylic acid metabolic process	1	0.36	carboxylic acid metabolic process
5	DNA metabolic process	1	0.6	nucleobase, nucleoside, nucleotide and nucleic acid metabolic process, biopolymer metabolic process
6	DNA packaging	1	0.36	cellular component organization and biogenesis
5	DNA repair	1	1.0	response to DNA damage stimulus, DNA metabolic process
4	electron transport	17	17.0	obsolete_biological_process
4	embryo sac central cell differentiation	1	0.6	megagametogenesis, cell differentiation
5	embryo sac development	1	0.576	gametophyte development
6	energy coupled proton transport, down electrochemical gradient	2	1.2	proton transport
7	establishment and/or maintenance of chromatin architecture	1	0.215	chromosome organization and biogenesis
3	establishment of cellular localization	4	1.44	establishment of localization, cellular localization
2	establishment of localization	19	6189	biological_process, localization
3	establishment of protein localization	5	2280	establishment of localization, protein localization
7	galactose metabolic process	1	1.0	hexose metabolic process
4	gametophyte development	1	0.345	multicellular organismal development
null	gene expression	16	7896	cellular process
3	generation of precursor metabolites and energy	2	0.72	cellular metabolic process
7	glucan biosynthetic process	2	1.6	glucan metabolic process, cellular polysaccharide biosynthetic process
6	glucan metabolic process	2	0.96	cellular polysaccharide metabolic process
8	glucose catabolic process	2	1.2	hexose catabolic process, glucose metabolic process
7	glucose metabolic process	2	0.72	hexose metabolic process
7	glutamate metabolic process	1	1.0	glutamine family amino acid metabolic process
8	glutamine biosynthetic process	1	1.0	glutamine family amino acid biosynthetic process, glutamine metabolic process
7	glutamine family amino acid biosynthetic process	1	0.6	amino acid biosynthetic process, glutamine family amino acid metabolic process
6	glutamine family amino acid metabolic process	2	0.96	amino acid metabolic process
7	glutamine metabolic process	1	0.6	glutamine family amino acid metabolic process
4	glycerol ether metabolic process	2	2.0	cellular metabolic process
5	glycolipid transport	1	1.0	lipid transport
9	glycolysis	2	2.0	glucose catabolic process
5	glycoprotein biosynthetic process	1	0.6	glycoprotein metabolic process, macromolecule biosynthetic process
6	glycoprotein metabolic process	1	0.36	cellular macromolecule metabolic process
4	heterocycle metabolic process	2	0.489	cellular metabolic process
7	hexose biosynthetic process	2	1.2	monosaccharide biosynthetic process, hexose metabolic process
7	hexose catabolic process	2	0.72	monosaccharide catabolic process, hexose metabolic process
6	hexose metabolic process	5	1752	monosaccharide metabolic process
8	histidine biosynthetic process	2	2.0	histidine family amino acid biosynthetic process, histidine metabolic process
7	histidine family amino acid biosynthetic process	2	1.2	histidine family amino acid metabolic process, amino acid biosynthetic process
6	histidine family amino acid metabolic process	2	0.72	amino acid metabolic process
7	histidine metabolic process	2	1.2	histidine family amino acid metabolic process
7	histidyl-tRNA aminoacylation	1	1.0	tRNA aminoacylation for protein translation
4	homeostatic process	3	1.08	regulation of biological quality
5	hormone-mediated signaling	2	2.0	intracellular signaling cascade, response to hormone stimulus
4	hydrogen transport	3	1032	transport
8	inositol biosynthetic process	2	2.0	hexose biosynthetic process, inositol metabolic process
7	inositol metabolic process	2	1.2	hexose metabolic process
6	integrin-mediated signaling pathway	2	2.0	cell surface receptor linked signal transduction
5	intracellular protein transport	3	3.0	protein transport, intracellular transport
5	intracellular signaling cascade	3	2.2	signal transduction
4	intracellular transport	3	1799	establishment of cellular localization, transport
4	ion transport	6	1931	transport
6	karyogamy	1	0.6	organelle fusion, nuclear organization and biogenesis
4	lipid biosynthetic process	2	0.72	biosynthetic process
6	lipid glycosylation	1	1.0	lipid modification, biopolymer glycosylation
4	lipid metabolic process	6	3475	primary metabolic process
5	lipid modification	1	0.6	macromolecule metabolic process, cellular lipid metabolic process
4	lipid transport	3	2.6	transport
5	lipoprotein biosynthetic process	1	0.215	macromolecule biosynthetic process, lipoprotein metabolic process
6	lipoprotein metabolic process	1	0.129	cellular protein metabolic process
2	localization	19	3713	biological_process
7	L-serine metabolic process	2	1.2	serine family amino acid metabolic process
8	lysine biosynthetic process	1	0.6	aspartate family amino acid biosynthetic process, lysine metabolic process
6	lysine biosynthetic process via diaminopimelate	1	1.0	lysine biosynthetic process, diaminopimelate metabolic process
7	lysine metabolic process	1	0.36	aspartate family amino acid metabolic process
4	macromolecular complex assembly	4	1.92	macromolecule metabolic process, cellular component assembly
4	macromolecule biosynthetic process	14	6432	macromolecule metabolic process, biosynthetic process
4	macromolecule catabolic process	3	0.222	macromolecule metabolic process, catabolic process
3	macromolecule localization	5	0.820	localization
3	macromolecule metabolic process	51	10.53	metabolic process
3	megagametogenesis	1	0.96	embryo sac development, developmental process
5	membrane fusion	1	0.6	membrane organization and biogenesis
5	membrane lipid biosynthetic process	2	1.2	lipid biosynthetic process, membrane lipid metabolic process
5	membrane lipid metabolic process	2	0.72	cellular lipid metabolic process
4	membrane organization and biogenesis	1	0.36	cellular component organization and biogenesis
2	metabolic process	127	57.21	biological_process
6	metal ion transport	1	1.0	cation transport
7	methionine biosynthetic process	1	1.0	methionine metabolic process, aspartate family amino acid biosynthetic process, sulfur amino acid biosynthetic process
6	methionine metabolic process	1	0.6	aspartate family amino acid metabolic process, sulfur amino acid metabolic process
6	modification-dependent macromolecule catabolic process	1	0.36	cellular macromolecule catabolic process
7	modification-dependent protein catabolic process	1	0.6	modification-dependent macromolecule catabolic process, proteolysis involved in cellular protein catabolic process
6	monosaccharide biosynthetic process	2	0.72	alcohol biosynthetic process, carbohydrate biosynthetic process, monosaccharide metabolic process
6	monosaccharide catabolic process	2	0.431	alcohol catabolic process, cellular carbohydrate catabolic process, monosaccharide metabolic process
5	monosaccharide metabolic process	5	1051	cellular carbohydrate metabolic process, alcohol metabolic process
6	monovalent inorganic cation transport	3	1032	cation transport
3	multicellular organismal development	1	0.207	multicellular organismal process, developmental process
2	multicellular organismal process	1	0.124	biological_process
2	multi-organism process	1	0.36	biological_process
4	nitrogen compound biosynthetic process	7	1111	nitrogen compound metabolic process, cellular biosynthetic process
3	nitrogen compound metabolic process	12	4763	metabolic process
4	nitrogen utilization	1	0.6	nitrogen compound metabolic process
6	nuclear membrane fusion	1	1.0	membrane fusion
5	nuclear organization and biogenesis	1	0.36	organelle organization and biogenesis
null	nucleobase, nucleoside and nucleotide metabolic process	4	0.763	nucleobase, nucleoside, nucleotide and nucleic acid metabolic process
4	nucleobase, nucleoside, nucleotide and nucleic acid metabolic process	12	3127	primary metabolic process, cellular metabolic process
6	nucleoside diphosphate metabolic process	1	0.6	nucleotide metabolic process
5	nucleoside metabolic process	1	1.0	nucleobase, nucleoside and nucleotide metabolic process
7	nucleoside phosphate metabolic process	3	0.271	nucleobase, nucleoside and nucleotide metabolic process
6	nucleoside triphosphate biosynthetic process	2	0.259	nucleotide biosynthetic process, nucleoside triphosphate metabolic process
6	nucleoside triphosphate metabolic process	2	0.155	nucleotide metabolic process
6	nucleosome assembly	1	1.0	protein-DNA complex assembly, chromatin assembly
5	nucleotide biosynthetic process	2	0.155	nucleotide metabolic process, cellular biosynthetic process
5	nucleotide metabolic process	3	0.453	nucleoside phosphate metabolic process
null	obsolete_biological_process	17	10.2
5	oligopeptide transport	2	2.0	peptide transport
4	one-carbon compound metabolic process	3	2.6	cellular metabolic process
5	organelle fusion	1	0.36	organelle organization and biogenesis
4	organelle organization and biogenesis	4	1709	cellular component organization and biogenesis
4	organic acid metabolic process	10	1803	cellular metabolic process
4	oxidative phosphorylation	2	1.2	generation of precursor metabolites and energy, phosphorylation
4	oxygen and reactive oxygen species metabolic process	1	0.6	cellular metabolic process
4	peptide transport	2	1.2	transport
5	phosphate metabolic process	13	5032	phosphorus metabolic process
6	phospholipid biosynthetic process	2	2.0	membrane lipid biosynthetic process, phospholipid metabolic process
6	phospholipid metabolic process	2	1.2	membrane lipid metabolic process
4	phosphorus metabolic process	13	3019	cellular metabolic process
6	phosphorylation	9	4.92	phosphate metabolic process
3	photosynthesis	5	5.0	cellular metabolic process
5	pigment biosynthetic process	1	0.6	pigment metabolic process, cellular biosynthetic process
4	pigment metabolic process	1	0.36	secondary metabolic process, cellular metabolic process
5	polar nucleus fusion	1	1.0	embryo sac central cell differentiation, karyogamy
3	pollination	1	0.6	multi-organism process, reproductive process
6	polysaccharide biosynthetic process	2	0.576	biopolymer biosynthetic process, carbohydrate biosynthetic process
5	polysaccharide metabolic process	2	0.345	carbohydrate metabolic process, biopolymer metabolic process
6	porphyrin biosynthetic process	1	0.6	cofactor biosynthetic process, tetrapyrrole biosynthetic process, porphyrin metabolic process
5	porphyrin metabolic process	1	0.36	cofactor metabolic process, tetrapyrrole metabolic process
7	post-translational protein modification	12	7.36	protein modification process
3	primary metabolic process	78	17.53	metabolic process
5	programmed cell death	1	0.6	cell death
7	protein amino acid dephosphorylation	3	3.0	post-translational protein modification, dephosphorylation
6	protein amino acid glycosylation	1	1.0	biopolymer glycosylation, glycoprotein biosynthetic process, protein modification process
6	protein amino acid lipidation	1	0.36	lipoprotein biosynthetic process, protein modification process
7	protein amino acid phosphorylation	7	7.0	post-translational protein modification, phosphorylation
8	protein amino acid prenylation	1	1.0	protein prenylation
5	protein catabolic process	1	0.129	protein metabolic process, biopolymer catabolic process
5	protein complex assembly	2	2.0	macromolecular complex assembly, protein metabolic process
6	protein folding	4	4216	cellular protein metabolic process
4	protein localization	5	1367	macromolecule localization
4	protein metabolic process	43	15.12	primary metabolic process, macromolecule metabolic process
8	protein modification by small protein conjugation	1	0.6	post-translational protein modification
6	protein modification process	18	9232	cellular protein metabolic process, biopolymer modification
7	protein prenylation	1	0.6	protein amino acid lipidation
4	protein secretion	1	1.0	establishment of protein localization, secretion by cell
4	protein transport	4	2.8	establishment of protein localization, transport
9	protein ubiquitination	1	1.0	protein modification by small protein conjugation, ubiquitin cycle
5	protein-DNA complex assembly	1	0.6	macromolecular complex assembly
5	protein-RNA complex assembly	1	0.6	macromolecular complex assembly, ribonucleoprotein complex biogenesis and assembly
6	proteolysis	6	5216	cellular protein metabolic process
7	proteolysis involved in cellular protein catabolic process	1	0.36	proteolysis, cellular protein catabolic process
5	proton transport	3	1.72	hydrogen transport, monovalent inorganic cation transport
7	pseudouridine synthesis	1	1.0	RNA modification
7	purine nucleoside triphosphate biosynthetic process	2	0.431	purine nucleoside triphosphate metabolic process, purine nucleotide biosynthetic process, nucleoside triphosphate biosynthetic process
7	purine nucleoside triphosphate metabolic process	2	0.259	nucleoside triphosphate metabolic process, purine nucleotide metabolic process
6	purine nucleotide biosynthetic process	2	0.259	nucleotide biosynthetic process, purine nucleotide metabolic process
6	purine nucleotide metabolic process	2	0.155	nucleotide metabolic process
8	purine ribonucleoside triphosphate biosynthetic process	2	0.72	ribonucleoside triphosphate biosynthetic process, purine ribonucleoside triphosphate metabolic process, purine ribonucleotide biosynthetic process, purine nucleoside triphosphate biosynthetic process
8	purine ribonucleoside triphosphate metabolic process	2	0.431	ribonucleoside triphosphate metabolic process, purine nucleoside triphosphate metabolic process, purine ribonucleotide metabolic process
7	purine ribonucleotide biosynthetic process	2	0.431	purine nucleotide biosynthetic process, ribonucleotide biosynthetic process, purine ribonucleotide metabolic process
7	purine ribonucleotide metabolic process	2	0.259	ribonucleotide metabolic process, purine nucleotide metabolic process
3	regulation of biological process	7	1655	biological_process, biological regulation
3	regulation of biological quality	3	0.647	biological regulation
4	regulation of catalytic activity	1	1.0	regulation of molecular function
4	regulation of cellular metabolic process	5	1799	regulation of metabolic process, regulation of cellular process, cellular metabolic process
3	regulation of cellular process	5	1799	cellular process, regulation of biological process
null	regulation of gene expression	5	3.0	gene expression, regulation of cellular process
3	regulation of metabolic process	7	2.04	regulation of biological process, metabolic process
3	regulation of molecular function	1	0.6	biological regulation
4	regulation of nitrogen compound metabolic process	1	0.6	nitrogen compound metabolic process, regulation of metabolic process
5	regulation of nitrogen utilization	1	1.0	regulation of nitrogen compound metabolic process, nitrogen utilization
5	regulation of nucleobase, nucleoside, nucleotide and nucleic acid metabolic process	5	3.0	regulation of cellular metabolic process, nucleobase, nucleoside, nucleotide and nucleic acid metabolic process
4	regulation of protein metabolic process	1	1.0	protein metabolic process, regulation of metabolic process
6	regulation of transcription	5	5.0	regulation of gene expression, transcription, regulation of nucleobase, nucleoside, nucleotide and nucleic acid metabolic process
2	reproduction	1	0.215	biological_process
2	reproductive process	1	0.36	biological_process, reproduction
3	response to abiotic stimulus	1	0.6	response to stimulus
3	response to biotic stimulus	1	1.0	response to stimulus
3	response to chemical stimulus	4	1680	response to stimulus
4	response to DNA damage stimulus	1	0.6	response to stress, response to endogenous stimulus
3	response to endogenous stimulus	3	1.08	response to stimulus
4	response to hormone stimulus	2	1.2	response to endogenous stimulus, response to chemical stimulus
4	response to nitrosative stress	1	0.6	response to stress
4	response to oxidative stress	1	1.0	response to stress, response to chemical stimulus
2	response to stimulus	7	3984	biological_process
3	response to stress	4	2.32	response to stimulus
4	response to toxin	1	0.6	response to chemical stimulus
4	response to water	1	1.0	response to abiotic stimulus
4	ribonucleoprotein complex biogenesis and assembly	1	0.36	cellular component organization and biogenesis
7	ribonucleoside triphosphate biosynthetic process	2	0.431	ribonucleoside triphosphate metabolic process, nucleoside triphosphate biosynthetic process, ribonucleotide biosynthetic process
7	ribonucleoside triphosphate metabolic process	2	0.259	ribonucleotide metabolic process, nucleoside triphosphate metabolic process
6	ribonucleotide biosynthetic process	2	0.259	nucleotide biosynthetic process, ribonucleotide metabolic process
6	ribonucleotide metabolic process	2	0.155	nucleotide metabolic process
5	RNA metabolic process	2	0.849	nucleobase, nucleoside, nucleotide and nucleic acid metabolic process, biopolymer metabolic process
6	RNA modification	1	0.6	biopolymer modification, RNA metabolic process
6	RNA processing	1	0.6	gene expression, RNA metabolic process
3	secondary metabolic process	1	0.215	metabolic process
3	secretion	1	0.36	establishment of localization
4	secretion by cell	1	0.6	establishment of cellular localization, secretion
7	serine family amino acid biosynthetic process	2	0.72	serine family amino acid metabolic process, amino acid biosynthetic process
6	serine family amino acid metabolic process	2	0.431	amino acid metabolic process
4	signal transduction	6	4.04	cell communication
6	sulfate assimilation	1	1.0	sulfur utilization
6	sulfur amino acid biosynthetic process	3	1319	amino acid biosynthetic process, sulfur compound biosynthetic process, sulfur amino acid metabolic process
5	sulfur amino acid metabolic process	3	0.791	sulfur metabolic process, amino acid metabolic process
5	sulfur compound biosynthetic process	3	0.791	cellular biosynthetic process, sulfur metabolic process
4	sulfur metabolic process	4	0.835	cellular metabolic process
5	sulfur utilization	1	0.6	sulfur metabolic process
5	superoxide metabolic process	1	1.0	oxygen and reactive oxygen species metabolic process
4	synergid death	1	1.0	pollination, programmed cell death
6	tetrapyrrole biosynthetic process	2	1359	tetrapyrrole metabolic process
5	tetrapyrrole metabolic process	2	0.816	heterocycle metabolic process
7	thiamin and derivative biosynthetic process	1	0.6	thiamin and derivative metabolic process
6	thiamin and derivative metabolic process	1	0.36	water-soluble vitamin metabolic process
7	thiamin biosynthetic process	1	1.0	thiamin and derivative biosynthetic process, water-soluble vitamin biosynthetic process, thiamin metabolic process
7	thiamin metabolic process	1	0.6	thiamin and derivative metabolic process
5	transcription	5	3.0	nucleobase, nucleoside, nucleotide and nucleic acid metabolic process, gene expression
5	translation	10	9559	gene expression, cellular protein metabolic process, cellular biosynthetic process, macromolecule biosynthetic process
6	translational elongation	1	1.0	biopolymer biosynthetic process, translation
6	translational initiation	1	1.0	protein-RNA complex assembly, translation
3	transport	18	9715	establishment of localization
7	tRNA aminoacylation	1	0.36	amino acid activation, tRNA metabolic process
6	tRNA aminoacylation for protein translation	1	0.6	tRNA aminoacylation, translation
6	tRNA metabolic process	2	0.816	RNA metabolic process
7	tRNA processing	1	1.0	tRNA metabolic process, RNA processing
8	ubiquitin cycle	1	0.6	post-translational protein modification
8	ubiquitin-dependent protein catabolic process	1	1.0	modification-dependent protein catabolic process
4	vesicle-mediated transport	2	2.0	transport
5	vitamin biosynthetic process	1	0.36	vitamin metabolic process, cellular biosynthetic process
4	vitamin metabolic process	1	0.129	cellular metabolic process
6	water-soluble vitamin biosynthetic process	1	0.6	water-soluble vitamin metabolic process, vitamin biosynthetic process
5	water-soluble vitamin metabolic process	1	0.215	vitamin metabolic process

## Sheet: molecular function
Sequence Distribution
Graph Level	GO Term	#Seq	Score	Parents
7	3'-5' exonuclease activity	1	1.0	exonuclease activity
6	3-cyanoalanine hydratase activity	1	1.0	hydro-lyase activity
7	5-methyltetrahydropteroyltriglutamate-homocysteine S-methyltransferase activity	1	1.0	S-methyltransferase activity, 5-methyltetrahydropteroyltri-L-glutamate-dependent methyltransferase activity
6	5-methyltetrahydropteroyltri-L-glutamate-dependent methyltransferase activity	1	0.6	methyltransferase activity
7	6-phosphofructokinase activity	1	1.0	phosphofructokinase activity
7	acetyltransferase activity	2	0.72	acyltransferase activity
5	acid-amino acid ligase activity	2	0.96	ligase activity, forming carbon-nitrogen bonds
5	acid-ammonia (or amide) ligase activity	1	0.36	ligase activity, forming carbon-nitrogen bonds
5	actin binding	3	3.0	cytoskeletal protein binding
4	active transmembrane transporter activity	2	0.431	transmembrane transporter activity
5	acyl-CoA dehydrogenase activity	3	3.0	oxidoreductase activity, acting on the CH-CH group of donors
6	acyltransferase activity	4	2432	transferase activity, transferring groups other than amino-acyl groups
6	adenosylhomocysteinase activity	1	1.0	trialkylsulfonium hydrolase activity
5	adenyl nucleotide binding	20	7199	purine nucleotide binding
6	adenyl ribonucleotide binding	20	12.0	adenyl nucleotide binding, purine ribonucleotide binding
3	amine binding	1	0.6	binding
4	amino acid binding	1	1.0	amine binding
6	aminoacyl-tRNA ligase activity	1	0.6	ligase activity, forming aminoacyl-tRNA and related compounds
6	ammonia ligase activity	1	0.6	acid-ammonia (or amide) ligase activity
7	anion channel activity	1	0.6	anion transmembrane transporter activity, ion channel activity
6	anion transmembrane transporter activity	1	0.36	ion transmembrane transporter activity
2	antioxidant activity	1	0.6	molecular_function
7	ATP binding	20	20.0	adenyl ribonucleotide binding
6	ATP phosphoribosyltransferase activity	2	2.0	transferase activity, transferring pentosyl groups
2	binding	103	52.97	molecular_function
5	calcium ion binding	3	3.0	cation binding, metal ion binding
6	carbohydrate kinase activity	1	0.36	kinase activity
6	carbonate dehydratase activity	1	1.0	hydro-lyase activity
4	carbon-carbon lyase activity	5	2.64	lyase activity
4	carbon-oxygen lyase activity	3	1.08	lyase activity
4	carbon-sulfur lyase activity	1	1.0	lyase activity
5	carboxylesterase activity	1	0.6	hydrolase activity, acting on ester bonds
5	carboxy-lyase activity	4	3.4	carbon-carbon lyase activity
7	caspase activity	1	1.0	cysteine-type endopeptidase activity
2	catalytic activity	116	59.34	molecular_function
4	cation binding	22	8.64	ion binding
6	cation transmembrane transporter activity	1	1.0	ion transmembrane transporter activity
5	channel activity	1	0.129	passive transmembrane transporter activity
4	cis-trans isomerase activity	1	0.6	isomerase activity
4	coenzyme binding	3	3.0	cofactor binding
3	cofactor binding	7	4199	binding
7	cyanoalanine nitrilase activity	1	1.0	nitrilase activity
3	cyclase activity	1	0.6	catalytic activity
6	cysteine protease inhibitor activity	1	1.0	endopeptidase inhibitor activity
6	cysteine-type endopeptidase activity	2	1.6	cysteine-type peptidase activity, endopeptidase activity
5	cysteine-type peptidase activity	2	1.96	peptidase activity
4	cytoskeletal protein binding	3	1799	protein binding
6	diaminopimelate epimerase activity	1	1.0	racemase and epimerase activity, acting on amino acids and derivatives
4	disulfide oxidoreductase activity	2	1.2	oxidoreductase activity
4	DNA binding	17	20.4	nucleic acid binding
5	DNA photolyase activity	1	1.0	carbon-carbon lyase activity
4	electron carrier activity	6	6.0	oxidoreductase activity
5	endopeptidase activity	5	3.28	peptidase activity
7	endopeptidase Clp activity	2	2.0	serine-type endopeptidase activity
5	endopeptidase inhibitor activity	2	1.2	protease inhibitor activity
3	enzyme inhibitor activity	3	1432	enzyme regulator activity
2	enzyme regulator activity	4	1075	molecular_function
6	exonuclease activity	1	0.6	nuclease activity
6	galactosyltransferase activity	1	1.0	transferase activity, transferring hexosyl groups
6	gated channel activity	1	0.215	channel activity
4	geranylgeranyl reductase activity	1	1.0	oxidoreductase activity
6	glucosyltransferase activity	1	0.6	transferase activity, transferring hexosyl groups
6	glutamate decarboxylase activity	1	1.0	carboxy-lyase activity
7	glutamate-ammonia ligase activity	1	1.0	ammonia ligase activity
4	glycolipid binding	1	1.0	lipid binding
5	glycolipid transporter activity	1	1.0	lipid transporter activity
4	heat shock protein binding	2	2.0	protein binding
4	heme binding	8	8.0	tetrapyrrole binding
7	histidine-tRNA ligase activity	1	1.0	aminoacyl-tRNA ligase activity
7	homocysteine S-methyltransferase activity	1	1.0	S-adenosylmethionine-dependent methyltransferase activity, S-methyltransferase activity
7	hydrogen-translocating pyrophosphatase activity	1	1.0	P-P-bond-hydrolysis-driven transmembrane transporter activity, pyrophosphatase activity
3	hydrolase activity	18	5574	catalytic activity
4	hydrolase activity, acting on acid anhydrides	2	0.647	hydrolase activity
5	hydrolase activity, acting on acid anhydrides, in phosphorus-containing anhydrides	2	1.08	hydrolase activity, acting on acid anhydrides
4	hydrolase activity, acting on carbon-nitrogen (but not peptide) bonds	1	0.215	hydrolase activity
5	hydrolase activity, acting on carbon-nitrogen (but not peptide) bonds, in nitriles	1	0.36	hydrolase activity, acting on carbon-nitrogen (but not peptide) bonds
4	hydrolase activity, acting on ester bonds	6	1564	hydrolase activity
4	hydrolase activity, acting on ether bonds	1	0.36	hydrolase activity
5	hydro-lyase activity	3	1799	carbon-oxygen lyase activity
7	inorganic diphosphatase activity	2	2.0	pyrophosphatase activity
5	inositol-3-phosphate synthase activity	2	2.0	intramolecular lyase activity
4	intramolecular lyase activity	2	1.2	isomerase activity
4	intramolecular transferase activity	1	0.36	isomerase activity
3	ion binding	26	7343	binding
6	ion channel activity	1	0.36	ion transmembrane transporter activity, substrate specific channel activity
5	ion transmembrane transporter activity	2	0.816	substrate-specific transmembrane transporter activity
6	iron ion binding	7	7.0	transition metal ion binding
4	iron-sulfur cluster binding	3	3.0	metal cluster binding
3	isomerase activity	8	2159	catalytic activity
5	kinase activity	10	6816	transferase activity, transferring phosphorus-containing groups
3	ligase activity	5	0.964	catalytic activity
5	ligase activity, forming aminoacyl-tRNA and related compounds	1	0.36	ligase activity, forming carbon-oxygen bonds
4	ligase activity, forming carbon-nitrogen bonds	3	0.791	ligase activity
4	ligase activity, forming carbon-oxygen bonds	1	0.215	ligase activity
4	ligase activity, forming phosphoric ester bonds	1	0.6	ligase activity
3	lipid binding	1	0.6	binding
4	lipid transporter activity	1	0.6	substrate-specific transporter activity
3	lyase activity	9	2832	catalytic activity
5	macromolecule transmembrane transporter activity	1	0.6	substrate-specific transmembrane transporter activity
5	magnesium ion binding	1	1.0	metal ion binding
3	metal cluster binding	3	1799	binding
4	metal ion binding	26	12.24	ion binding
5	metallopeptidase activity	1	1.0	peptidase activity
5	methionine adenosyltransferase activity	1	1.0	transferase activity, transferring alkyl or aryl (other than methyl) groups
5	methyltransferase activity	5	3079	transferase activity, transferring one-carbon groups
2	molecular transducer activity	3	1.08	molecular_function
1	molecular_function	190	75.38
4	monooxygenase activity	7	7.0	oxidoreductase activity
6	nitrilase activity	1	0.6	hydrolase activity, acting on carbon-nitrogen (but not peptide) bonds, in nitriles
5	nuclease activity	1	0.36	hydrolase activity, acting on ester bonds
3	nucleic acid binding	28	20.72	binding
6	nucleobase, nucleoside, nucleotide kinase activity	1	0.6	kinase activity
3	nucleotide binding	23	6592	binding
7	nucleotide kinase activity	1	1.0	nucleobase, nucleoside, nucleotide kinase activity
5	nucleotidyltransferase activity	1	1.0	transferase activity, transferring phosphorus-containing groups
8	O-acetyltransferase activity	2	1.2	O-acyltransferase activity, acetyltransferase activity
7	O-acyltransferase activity	2	0.72	acyltransferase activity
3	oxidoreductase activity	29	21.13	catalytic activity
4	oxidoreductase activity, acting on CH or CH2 groups	1	0.36	oxidoreductase activity
5	oxidoreductase activity, acting on CH or CH2 groups, disulfide as acceptor	1	0.6	oxidoreductase activity, acting on CH or CH2 groups
4	oxidoreductase activity, acting on peroxide as acceptor	1	0.6	oxidoreductase activity
4	oxidoreductase activity, acting on superoxide radicals as acceptor	1	0.6	oxidoreductase activity
4	oxidoreductase activity, acting on the CH-CH group of donors	3	1799	oxidoreductase activity
4	passive transmembrane transporter activity	1	0.077	transmembrane transporter activity
6	pectinesterase activity	1	1.0	carboxylesterase activity
4	peptidase activity	6	3167	hydrolase activity
5	peptidyl-prolyl cis-trans isomerase activity	1	1.0	cis-trans isomerase activity
3	peroxidase activity	1	1.0	antioxidant activity, oxidoreductase activity, acting on peroxide as acceptor
3	phosphatase regulator activity	1	0.36	enzyme regulator activity
6	phosphofructokinase activity	1	0.6	phosphotransferase activity, alcohol group as acceptor, carbohydrate kinase activity
6	phosphoglycerate kinase activity	1	1.0	phosphotransferase activity, carboxyl group as acceptor, kinase activity
7	phosphoprotein phosphatase activity	3	1799	phosphoric monoester hydrolase activity
5	phosphoric ester hydrolase activity	4	1648	hydrolase activity, acting on ester bonds
6	phosphoric monoester hydrolase activity	3	1.08	phosphoric ester hydrolase activity
5	phosphotransferase activity, alcohol group as acceptor	8	6.0	transferase activity, transferring phosphorus-containing groups
5	phosphotransferase activity, carboxyl group as acceptor	1	0.6	transferase activity, transferring phosphorus-containing groups
6	porphobilinogen synthase activity	1	1.0	hydro-lyase activity
5	P-P-bond-hydrolysis-driven protein transmembrane transporter activity	1	1.0	protein transmembrane transporter activity, P-P-bond-hydrolysis-driven transmembrane transporter activity, macromolecule transmembrane transporter activity
6	P-P-bond-hydrolysis-driven transmembrane transporter activity	2	1.2	primary active transmembrane transporter activity
5	prenyltransferase activity	1	0.6	transferase activity, transferring alkyl or aryl (other than methyl) groups
5	primary active transmembrane transporter activity	2	0.72	active transmembrane transporter activity
4	protease inhibitor activity	2	0.72	enzyme inhibitor activity
3	protein binding	20	16.64	binding
4	protein dimerization activity	1	1.0	protein binding
5	protein disulfide oxidoreductase activity	2	2.0	disulfide oxidoreductase activity
4	protein domain specific binding	1	1.0	protein binding
6	protein kinase activity	7	9.4	phosphotransferase activity, alcohol group as acceptor, kinase activity
4	protein phosphatase regulator activity	1	0.6	phosphatase regulator activity
5	protein phosphatase type 2A regulator activity	1	1.0	protein phosphatase regulator activity
6	protein prenyltransferase activity	1	1.0	prenyltransferase activity
7	protein serine/threonine kinase activity	4	4.0	protein kinase activity
8	protein serine/threonine phosphatase activity	3	3.0	phosphoprotein phosphatase activity
4	protein transmembrane transporter activity	1	0.6	protein binding, protein transporter activity, substrate-specific transmembrane transporter activity
4	protein transporter activity	3	2.36	substrate-specific transporter activity
5	pseudouridine synthase activity	1	0.6	intramolecular transferase activity
4	purine nucleotide binding	20	4319	nucleotide binding
5	purine ribonucleotide binding	20	7199	purine nucleotide binding, ribonucleotide binding
4	pyridoxal phosphate binding	4	4.0	cofactor binding, vitamin binding
6	pyrophosphatase activity	2	1799	hydrolase activity, acting on acid anhydrides, in phosphorus-containing anhydrides
4	racemase and epimerase activity	4	1.44	isomerase activity
5	racemase and epimerase activity, acting on amino acids and derivatives	1	0.6	racemase and epimerase activity
5	racemase and epimerase activity, acting on carbohydrates and derivatives	3	1799	racemase and epimerase activity
4	receptor activity	2	2.0	signal transducer activity
6	ribonucleoside-diphosphate reductase activity	1	1.0	oxidoreductase activity, acting on CH or CH2 groups, disulfide as acceptor
4	ribonucleotide binding	20	4319	nucleotide binding
6	ribulose-bisphosphate carboxylase activity	3	3.0	carboxy-lyase activity
6	ribulose-phosphate 3-epimerase activity	2	2.0	racemase and epimerase activity, acting on carbohydrates and derivatives
4	RNA binding	5	4.6	nucleic acid binding
4	RNA-3'-phosphate cyclase activity	1	1.0	ligase activity, forming phosphoric ester bonds, cyclase activity
6	S-adenosylmethionine-dependent methyltransferase activity	2	1.2	methyltransferase activity
5	sequence-specific DNA binding	6	6.0	DNA binding
4	serine hydrolase activity	2	0.431	hydrolase activity
9	serine O-acetyltransferase activity	2	2.0	serine O-acyltransferase activity, O-acetyltransferase activity
8	serine O-acyltransferase activity	2	1.2	O-acyltransferase activity
6	serine-type endopeptidase activity	2	1.2	serine-type peptidase activity, endopeptidase activity
6	serine-type endopeptidase inhibitor activity	1	1.0	endopeptidase inhibitor activity
5	serine-type peptidase activity	2	0.72	peptidase activity, serine hydrolase activity
3	signal transducer activity	3	1799	molecular transducer activity
6	small conjugating protein ligase activity	2	1.6	acid-amino acid ligase activity
6	S-methyltransferase activity	3	1799	methyltransferase activity
7	starch synthase activity	1	1.0	glucosyltransferase activity
3	structural constituent of cell wall	1	1.0	structural molecule activity
3	structural constituent of ribosome	7	7.0	structural molecule activity
2	structural molecule activity	9	5.8	molecular_function
6	substrate specific channel activity	1	0.215	channel activity
4	substrate-specific transmembrane transporter activity	3	0.849	substrate-specific transporter activity, transmembrane transporter activity
3	substrate-specific transporter activity	6	2069	transporter activity
5	superoxide dismutase activity	1	1.0	oxidoreductase activity, acting on superoxide radicals as acceptor
3	tetrapyrrole binding	8	4.8	binding
7	thiopurine S-methyltransferase activity	1	1.0	S-adenosylmethionine-dependent methyltransferase activity, S-methyltransferase activity
6	threonine endopeptidase activity	1	1.0	endopeptidase activity
5	transaminase activity	1	1.0	transferase activity, transferring nitrogenous groups
3	transcription factor activity	8	8.0	DNA binding, transcription regulator activity
2	transcription regulator activity	10	6.0	molecular_function
3	transcription repressor activity	1	1.0	transcription regulator activity
3	transferase activity	31	9573	catalytic activity
4	transferase activity, transferring acyl groups	4	0.875	transferase activity
4	transferase activity, transferring aldehyde or ketonic groups	1	0.6	transferase activity
4	transferase activity, transferring alkyl or aryl (other than methyl) groups	2	0.96	transferase activity
4	transferase activity, transferring glycosyl groups	4	1296	transferase activity
5	transferase activity, transferring groups other than amino-acyl groups	4	1459	transferase activity, transferring acyl groups
5	transferase activity, transferring hexosyl groups	2	0.96	transferase activity, transferring glycosyl groups
4	transferase activity, transferring nitrogenous groups	1	0.6	transferase activity
4	transferase activity, transferring one-carbon groups	5	1847	transferase activity
5	transferase activity, transferring pentosyl groups	2	1.2	transferase activity, transferring glycosyl groups
4	transferase activity, transferring phosphorus-containing groups	11	4776	transferase activity
5	transition metal ion binding	19	11.39	cation binding, metal ion binding
5	transketolase activity	1	1.0	transferase activity, transferring aldehyde or ketonic groups
4	translation elongation factor activity	1	1.0	translation factor activity, nucleic acid binding
3	translation factor activity, nucleic acid binding	2	1.2	translation regulator activity, nucleic acid binding
4	translation initiation factor activity	1	1.0	translation factor activity, nucleic acid binding
2	translation regulator activity	2	0.72	molecular_function
3	transmembrane transporter activity	4	0.608	transporter activity
2	transporter activity	10	4300	molecular_function
5	trialkylsulfonium hydrolase activity	1	0.6	hydrolase activity, acting on ether bonds
5	tRNA binding	1	1.0	RNA binding
6	tRNA-pseudouridine synthase activity	1	1.0	pseudouridine synthase activity
3	two-component response regulator activity	1	1.0	signal transducer activity, transcription regulator activity
4	ubiquitin-protein ligase activity	1	1.0	small conjugating protein ligase activity
6	UDP-glucose 4-epimerase activity	1	1.0	racemase and epimerase activity, acting on carbohydrates and derivatives
4	unfolded protein binding	3	3.0	protein binding
3	vitamin binding	4	2.4	binding
8	voltage-gated anion channel activity	1	1.0	voltage-gated ion channel activity, anion channel activity
7	voltage-gated channel activity	1	0.36	gated channel activity
7	voltage-gated ion channel activity	1	0.6	voltage-gated channel activity, ion channel activity
6	zinc ion binding	12	12.0	transition metal ion binding

## Sheet: Component
Sequence Distribution
Graph Level	GO Term	#Seq	Score	Parents
1	cellular_component	82	15.30
2	cell part	81	30.20	cell, cellular_component
2	cell	81	18.12	cellular_component
2	macromolecular complex	30	9524	cellular_component
2	organelle	35	6120	cellular_component
2	extracellular region	3	3.0	cellular_component
2	organelle part	13	2289	cellular_component, organelle
2	envelope	3	0.388	cellular_component
3	membrane	34	26.56	cell part
3	intracellular	52	21.01	cell part
3	intracellular part	48	15.02	intracellular, cell part
3	protein complex	23	11.45	macromolecular complex
3	intracellular organelle	35	9786	organelle, intracellular part
3	membrane-bounded organelle	27	7257	organelle
3	ribonucleoprotein complex	7	4416	macromolecular complex, intracellular part
3	protein serine/threonine phosphatase complex	4	3.6	protein complex, cell part
3	membrane part	9	3412	membrane, cell part
3	intracellular organelle part	13	3383	organelle part, intracellular organelle, intracellular part
3	non-membrane-bounded organelle	9	2943	organelle
3	organelle membrane	4	1126	membrane-bounded organelle, organelle part, membrane
3	organelle envelope	3	0.647	membrane-bounded organelle, envelope, intracellular organelle part
3	external encapsulating structure	1	0.36	cell part
3	vesicle	1	0.077	organelle
4	cytoplasm	31	13.90	intracellular part
4	cytoplasmic part	24	11.50	intracellular part, cytoplasm
4	intracellular membrane-bounded organelle	27	11.40	intracellular organelle, membrane-bounded organelle
4	ribosome	7	7.36	cytoplasmic part, intracellular non-membrane-bounded organelle, ribonucleoprotein complex
4	intracellular non-membrane-bounded organelle	9	4905	intracellular organelle, non-membrane-bounded organelle
4	proton-transporting two-sector ATPase complex	3	3.0	protein complex, membrane part
4	photosystem I reaction center	2	2.0	thylakoid part, protein complex, photosystem I
4	photosystem	4	1.92	thylakoid part, protein complex
4	thylakoid part	4	1.92	thylakoid, intracellular organelle part
4	mitochondrial membrane	3	1799	organelle membrane, mitochondrial part, mitochondrial envelope
4	ribulose bisphosphate carboxylase complex	3	1799	cytoplasmic part, protein complex
4	membrane coat	2	1295	cytoplasmic part, protein complex, coated membrane, membrane part
4	receptor complex	2	1.2	protein complex
4	organelle inner membrane	2	1.2	organelle membrane, organelle envelope
4	plasma membrane part	4	1152	plasma membrane, membrane part
4	plastid part	3	1.08	cytoplasmic part, plastid, intracellular organelle part
4	mitochondrial part	3	1.08	cytoplasmic part, mitochondrion, intracellular organelle part
4	mitochondrial envelope	3	1.08	organelle envelope, mitochondrial part
4	intrinsic to membrane	3	1032	membrane part
4	nucleosome	1	1.0	protein complex, chromatin, chromosomal part
4	eukaryotic translation elongation factor 1 complex	1	1.0	cytoplasmic part, protein complex
4	6-phosphofructokinase complex	1	1.0	protein complex, cytosolic part
4	ubiquitin ligase complex	1	1.0	protein complex, intracellular part
4	protein phosphatase type 2A complex	1	1.0	intracellular part, protein serine/threonine phosphatase complex
4	proteasome core complex	1	1.0	protein complex, proteasome complex, cytosolic part
4	coated membrane	2	0.777	membrane
4	plasma membrane	4	0.691	membrane
4	cell wall	1	0.6	external encapsulating structure
4	proteasome complex	1	0.6	protein complex, intracellular part
4	ribosomal subunit	1	0.6	ribosome, cytoplasmic part, intracellular organelle part, ribonucleoprotein complex
4	AP-type membrane coat adaptor complex	1	0.6	cytoplasmic part, protein complex, membrane coat, membrane part
4	organelle outer membrane	1	0.6	organelle membrane, outer membrane, organelle envelope
4	Golgi apparatus part	1	0.6	cytoplasmic part, Golgi apparatus, intracellular organelle part
4	chromosomal part	1	0.36	chromosome, intracellular organelle part
4	outer membrane	1	0.36	membrane part
4	Golgi membrane	1	0.215	Golgi apparatus part, organelle membrane, endomembrane system, membrane part
4	cytoplasmic vesicle part	1	0.215	cytoplasmic part, cytoplasmic vesicle, intracellular organelle part
4	cytoplasmic vesicle	1	0.129	cytoplasmic part, vesicle, intracellular organelle
4	vesicle membrane	1	0.077	organelle membrane, membrane-bounded vesicle, endomembrane system, membrane part
4	membrane-bounded vesicle	1	0.046	vesicle
4	endomembrane system	1	0.046	membrane
5	nucleus	10	10.0	intracellular membrane-bounded organelle
5	photosystem I	4	3.2	photosystem
5	chloroplast ribulose bisphosphate carboxylase complex	3	3.0	chloroplast part, ribulose bisphosphate carboxylase complex, chloroplast stroma
5	Golgi apparatus	3	2.36	cytoplasmic part, intracellular membrane-bounded organelle
5	clathrin coat	2	2.16	membrane coat
5	integrin complex	2	2.0	receptor complex, integral to plasma membrane, plasma membrane part
5	clathrin coat of coated pit	2	2.0	coated pit, plasma membrane part, clathrin coat
5	mitochondrial inner membrane	2	2.0	mitochondrial membrane, organelle inner membrane
5	endoplasmic reticulum	2	2.0	cytoplasmic part, intracellular membrane-bounded organelle
5	chloroplast part	3	1799	chloroplast, plastid part
5	integral to membrane	3	1.72	intrinsic to membrane
5	mitochondrion	4	1648	cytoplasmic part, intracellular membrane-bounded organelle
5	coated pit	2	1.2	plasma membrane part
5	microbody	2	1.2	cytoplasmic part, intracellular membrane-bounded organelle
5	cytosolic part	2	1.2	cytoplasmic part, cytosol
5	thylakoid	4	1152	intracellular membrane-bounded organelle
5	plastid stroma	3	1.08	plastid part
5	clathrin coat of trans-Golgi network vesicle	1	1.0	Golgi apparatus part, clathrin vesicle coat, trans-Golgi network transport vesicle membrane
5	clathrin adaptor complex	1	1.0	clathrin coat, AP-type membrane coat adaptor complex
5	mitochondrial outer membrane	1	1.0	mitochondrial membrane, organelle outer membrane
5	large ribosomal subunit	1	1.0	ribosomal subunit
5	cellulose and pectin-containing cell wall	1	1.0	cell wall
5	cytosol	2	0.72	cytoplasmic part
5	intrinsic to plasma membrane	2	0.72	plasma membrane part, intrinsic to membrane
5	plastid	3	0.647	cytoplasmic part, intracellular membrane-bounded organelle
5	cytoskeleton	1	0.6	intracellular non-membrane-bounded organelle
5	chromatin	1	0.6	chromosomal part
5	vesicle coat	1	0.36	membrane coat, cytoplasmic vesicle part, coated vesicle membrane
5	Golgi-associated vesicle membrane	1	0.36	cytoplasmic vesicle membrane, Golgi-associated vesicle, Golgi membrane
5	chromosome	1	0.215	intracellular non-membrane-bounded organelle
5	Golgi-associated vesicle	1	0.215	Golgi apparatus part, cytoplasmic membrane-bounded vesicle
5	cytoplasmic vesicle membrane	1	0.129	cytoplasmic vesicle part, vesicle membrane, cytoplasmic membrane-bounded vesicle
5	cytoplasmic membrane-bounded vesicle	1	0.077	cytoplasmic vesicle, intracellular membrane-bounded organelle, membrane-bounded vesicle
6	peroxisome	2	2.0	microbody
6	chloroplast stroma	3	1799	chloroplast part, plastid stroma
6	integral to plasma membrane	2	1.2	integral to membrane, intrinsic to plasma membrane
6	chloroplast	3	1.08	plastid
6	actin cytoskeleton	1	1.0	cytoskeleton
6	clathrin vesicle coat	1	0.6	vesicle coat, clathrin coated vesicle membrane, clathrin coat
6	trans-Golgi network transport vesicle membrane	1	0.6	Golgi-associated vesicle membrane, clathrin coated vesicle membrane, transport vesicle membrane, trans-Golgi network transport vesicle
6	transport vesicle membrane	1	0.36	cytoplasmic vesicle membrane, transport vesicle
6	trans-Golgi network transport vesicle	1	0.36	transport vesicle, Golgi-associated vesicle, clathrin-coated vesicle
6	transport vesicle	1	0.215	cytoplasmic membrane-bounded vesicle
6	coated vesicle membrane	1	0.215	cytoplasmic vesicle membrane, coated vesicle
6	coated vesicle	1	0.129	cytoplasmic membrane-bounded vesicle
7	clathrin coated vesicle membrane	1	0.36	clathrin-coated vesicle, coated vesicle membrane
7	clathrin-coated vesicle	1	0.215	coated vesicle
